# Supplementary material
Source: publisher site journal article supplement (https://static.cambridge.org/content/id/urn:cambridge.org:id:article:S0008347X20000413/resource/name/S0008347X20000413supp001.pdf)
Supplement: Supplementary file 1 [file S0008347X20000413supp001.pdf]

**Spatial distribution of spotted-wing drosophila (Diptera: Drosophilidae) and other insects in fruit of a sweet cherry (Rosaceae) orchard: supplemental material**

Amanda C. Chamberlain, Robert Lalonde, and Howard M. A. Thistlewood

**Supplementary Table S1.** Pesticides applied in study orchard with date and type of material in 2015.

| <b>Trade name</b>             | <b>Common name of active ingredient</b> | <b>Application date</b> | <b>Activity type</b> |
|-------------------------------|-----------------------------------------|-------------------------|----------------------|
| Pristine WG                   | boscalid + pyraclostrobin               | 4 May                   | fungicide            |
| Cheminova                     | glyphosate                              | 25 May                  | herbicide            |
| Naturalyte GF120 <sup>a</sup> | Spinosad                                | 10 June                 | insecticide          |
| Naturalyte GF120              | Spinosad                                | 16 June                 | insecticide          |
| Naturalyte GF120              | Spinosad                                | 19 June                 | insecticide          |
| Senator                       | thiophanate-methyl                      | 19 June                 | fungicide            |
| Naturalyte GF120              | Spinosad                                | 22 June                 | insecticide          |
| Naturalyte GF120              | Spinosad                                | 29 June                 | insecticide          |
| Naturalyte GF120              | spinosad                                | 14 July                 | insecticide          |

<sup>a</sup> Selective fruit bait for suppression of *Rhagoletis* species,

(0.2 g L<sup>-1</sup> of *a.i.*), maximum of 60 mL per tree.

**Supplementary Table S2.** Cherry cultivars, number of fruit examined in preliminary samples on given dates for presence of *Drosophila suzukii*, and estimated date of first infestation.

| <b>Cultivar</b> | <b>Number<br/>of fruit</b> | <b>Date collected</b> | <b>First<br/>infestation</b> |
|-----------------|----------------------------|-----------------------|------------------------------|
| Montmorency     | 10                         | 15 June               |                              |
| "               | 6                          | 24 June               | 24 June                      |
| Santina         | 180 <sup>a</sup>           | 10 June               | 10 June                      |
| "               | 3                          | 15 June               |                              |
| Sonata          | 20                         | 15 June               | 15 June                      |
| "               | 4                          | 24 June               |                              |
| Lapins          | 20                         | 15 June               | 15 June                      |
| "               | 3                          | 24 June               |                              |
| "               | 10                         | 6 July                |                              |
| Skeena          | 20                         | 15 June               | 24 June                      |
| "               | 6                          | 24 June               |                              |
| "               | 10                         | 6 July                |                              |
| Sweetheart      | 20                         | 15 June               | 6 July                       |
| "               | 9                          | 24 June               |                              |
| "               | 10                         | 6 July                |                              |
| Staccato        | 15                         | 15 June               | 6 July                       |
| "               | 10                         | 24 June               |                              |
| "               | 10                         | 6 July                |                              |

<sup>a</sup> Date of first collection was 10 June.

**Supplementary Table S3.** Two-way analysis of variance of *Drosophila suzukii*

adults emerging from cultivar Sonata cherries by row, height, and row X height.

| <b>Source</b>   | <b>Sum of squares</b> | <b>df</b> | <b>Mean square</b> | <b>F-ratio</b> | <b>P-value</b> |
|-----------------|-----------------------|-----------|--------------------|----------------|----------------|
| Corrected model | 126.763 <sup>a</sup>  | 5         | 25.353             | 1.779          | 0.1170         |
| Error           | 4247.185              | 298       | 14.252             |                |                |
| Corrected total | 4373.947              | 303       |                    |                |                |

df = degrees of freedom.

<sup>a</sup>  $R^2 = 0.029$ ,  $R^2(\text{Adj.}) = 0.013$ .

**Supplementary Table S4.** Two-way analysis of variance of *Drosophila suzukii*

adults emerging from cultivar Skeena cherries by row, height, and row X height.

| <b>Source</b>   | <b>Sum of squares</b> | <b>df</b> | <b>Mean square</b> | <b>F-ratio</b> | <b>P-value</b> |
|-----------------|-----------------------|-----------|--------------------|----------------|----------------|
| Corrected model | 433.527 <sup>a</sup>  | 5         | 86.705             | 2.299          | 0.0449         |
| Row             | 178.112               | 2         | 89.056             | 2.361          | 0.0959         |
| Height          | 0.487                 | 1         | 0.487              | 0.013          | 0.9096         |
| Row X height    | 251.906               | 2         | 125.953            | 3.340          | 0.0367         |
| Error           | 11993.029             | 318       | 37.714             |                |                |
| Corrected total | 12426.556             | 323       |                    |                |                |

df = degrees of freedom.

<sup>a</sup>  $R^2 = 0.035$ ,  $R^2(\text{Adj}) = 0.020$ .

**Supplementary Table S5.** Two-way analysis of variance of *Drosophila suzukii* adults emerging from cultivar Sweetheart cherries by row, height, and row X height.

| <b>Source</b>   | <b>Sum of squares</b> | <b>df</b> | <b>Mean square</b> | <b>F-ratio</b> | <b>P-value</b> |
|-----------------|-----------------------|-----------|--------------------|----------------|----------------|
| Corrected Model | 165.246 <sup>a</sup>  | 5         | 33.049             | 0.960          | 0.442          |
| Error           | 12496.971             | 363       | 34.427             |                |                |
| Corrected Total | 12662.217             | 368       |                    |                |                |

df = degrees of freedom.

<sup>a</sup>  $R^2 = 0.013$ ,  $R^2(\text{Adj}) = -0.000$ .

**Supplementary Table S6.** Two-way analysis of variance of *Drosophila suzukii* adults emerging from cultivar Staccato cherries by row, height, and row X height.

| <b>Source</b>   | <b>Sum of squares</b> | <b>df</b> | <b>Mean square</b> | <b>F-ratio</b> | <b>P-value</b> |
|-----------------|-----------------------|-----------|--------------------|----------------|----------------|
| Corrected model | 651.086 <sup>a</sup>  | 5         | 130.217            | 130.217        | 5.1984         |
| Row             | 199.712               | 2         | 99.856             | 3.986          | 0.0194         |
| Height          | 448.127               | 1         | 448.127            | 17.890         | 0.0001         |
| Row X height    | 12.051                | 2         | 6.026              | 0.241          | 0.7863         |
| Error           | 9042.909              | 361       | 25.050             |                |                |
| Corrected total | 9693.995              | 366       |                    |                |                |

df = degrees of freedom.

<sup>a</sup>  $R^2 = 0.067$ ,  $R^2(\text{Adj}) = 0.054$ .

**Supplementary Table S7.** Two-way analysis of variance of *Drosophila suzukii*

adults emerging from cultivar Sonata cherries by row, aspect, and row X aspect.

| <b>Source</b>   | <b>Sum of squares</b> | <b>df</b> | <b>Mean square</b> | <b>F-ratio</b> | <b>P-value</b> |
|-----------------|-----------------------|-----------|--------------------|----------------|----------------|
| Corrected model | 232.293 <sup>a</sup>  | 5         | 46.459             | 3.343          | 0.0059         |
| Row             | 107.528               | 2         | 53.764             | 3.868          | 0.0219         |
| Aspect          | 80.035                | 1         | 80.035             | 5.759          | 0.0170         |
| Row X aspect    | 46.329                | 2         | 23.164             | 1.667          | 0.1906         |
| Error           | 4141.654              | 298       | 13.898             |                |                |
| Corrected total | 4373.947              | 303       |                    |                |                |

df = degrees of freedom.

<sup>a</sup>  $R^2 = 0.053$ ,  $R^2(\text{Adj}) = 0.037$ .



**Supplementary Table S8.** Two-way analysis of variance of *Drosophila suzukii*

adults emerging from cultivar Skeena cherries by row, aspect, and row X aspect.

| <b>Source</b>   | <b>Sum of squares</b> | <b>df</b> | <b>Mean square</b> | <b>F-ratio</b> | <b>P-value</b> |
|-----------------|-----------------------|-----------|--------------------|----------------|----------------|
| Corrected model | 203.861 <sup>a</sup>  | 5         | 40.772             | 1.061          | 0.3821         |
| Error           | 12222.695             | 318       | 38.436             |                |                |
| Corrected total | 12426.556             | 323       |                    |                |                |

df = degrees of freedom.

<sup>a</sup>  $R^2 = 0.016$ ,  $R^2(\text{Adj}) = 0.001$ .

**Supplementary Table S9.** Two-way analysis of variance of *Drosophila suzukii*

adults emerging from cultivar Sweetheart cherries by row, aspect, and row X aspect.

| <b>Source</b>   | <b>Sum of squares</b> | <b>df</b> | <b>Mean square</b> | <b>F-ratio</b> | <b>P-value</b> |
|-----------------|-----------------------|-----------|--------------------|----------------|----------------|
| Corrected model | 208.715 <sup>a</sup>  | 5         | 41.743             | 1.217          | 0.3006         |
| Error           | 12453.502             | 363       | 34.307             |                |                |
| Corrected total | 12662.217             | 368       |                    |                |                |

df = degrees of freedom.

<sup>a</sup>  $R^2 = 0.016$ ,  $R^2(\text{Adj}) = 0.003$ .

**Supplementary Table S10.** Two-way analysis of variance of *Drosophila suzukii* adults emerging from cultivar Staccato cherries by row, aspect, and row X aspect.

| <b>Source</b>   | <b>Sum of squares</b> | <b>df</b> | <b>Mean square</b> | <b>F-ratio</b> | <b>P-value</b> |
|-----------------|-----------------------|-----------|--------------------|----------------|----------------|
| Corrected model | 654.890 <sup>a</sup>  | 5         | 130.978            | 5.231          | 0.0001         |
| Row             | 190.877               | 2         | 95.439             | 3.812          | 0.0230         |
| Aspect          | 316.161               | 1         | 316.161            | 12.627         | 0.0004         |
| Row X aspect    | 145.581               | 2         | 72.790             | 2.907          | 0.0559         |
| Error           | 9039.105              | 361       | 25.039             | 25.039         |                |
| Corrected total | 9693.995              | 366       | 26.486             |                |                |

df = degrees of freedom.

<sup>a</sup>  $R^2 = 0.068$ ,  $R^2(\text{Adj}) = 0.055$ .
